## RESEARCH ARTICLE

# A mixed-methods approach to understand university students' perceived impact of returning to class during COVID-19 on their mental and general health

Qinglan Ding<sup>1\*</sup>, Mark Daniel Ward<sup>2</sup>, Nancy Edwards<sup>3</sup>, Emily Anna Wu<sup>4</sup>, Susan Kersey<sup>3</sup>, Marjorie Funk<sup>5</sup>

**1** College of Health and Human Sciences, Purdue University, West Lafayette, IN, United States of America, **2** College of Science, Purdue University, West Lafayette, IN, United States of America, **3** School of Nursing, Purdue University, West Lafayette, IN, United States of America, **4** Krannert School of Management, Purdue University, West Lafayette, IN, United States of America, **5** School of Nursing, Yale University, West Haven, CT, United States of America

\* [qinglanding@purdue.edu](mailto:qinglanding@purdue.edu)

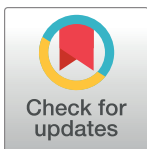

## OPEN ACCESS

**Citation:** Ding Q, Ward MD, Edwards N, Wu EA, Kersey S, Funk M (2023) A mixed-methods approach to understand university students' perceived impact of returning to class during COVID-19 on their mental and general health. *PLoS ONE* 18(1): e0279813. <https://doi.org/10.1371/journal.pone.0279813>

**Editor:** Steph Scott, Newcastle University, UNITED KINGDOM

**Received:** February 25, 2022

**Accepted:** December 15, 2022

**Published:** January 3, 2023

**Copyright:** © 2023 Ding et al. This is an open access article distributed under the terms of the [Creative Commons Attribution License](https://creativecommons.org/licenses/by/4.0/), which permits unrestricted use, distribution, and reproduction in any medium, provided the original author and source are credited.

**Data Availability Statement:** The minimal anonymized survey quantitative data set has been uploaded to The Purdue University Research Repository (PURR) <https://purrr.purdue.edu/publications/4083/1>. The link and citation of the data source is Ding, Q.; Ward, M. D.; Nancy, E.; Wu, E.; Kersey, S.; Funk, M. (2023), "Data for Impact of Returning to Class in COVID on University Students' Health." (DOI: [10.4231/9EYZ-EA71](https://doi.org/10.4231/9EYZ-EA71)).

## Abstract

### Purpose

This study investigated the prevalence and risk factors of mental and general health symptoms among university students attending in-person and online classes during COVID-19. We also explored their experiences returning to in-person classes and their views on the university's COVID-19-related policies.

### Methods

In this sequential explanatory mixed-methods study (2020–2021), U.S. university student respondents (N = 1030; 603 women [58.5%], 907 [88.1%] aged 18–24 years) completed a quantitative, cross-sectional survey assessing their mental and general health symptoms experienced while taking classes during the COVID-19 pandemic. The survey link was distributed through social media and email invitations. Three separate follow-up focus groups (n = 27), consisting of an average of nine focus group respondents who had completed the quantitative survey per group, were conducted using a semi-structured interview guide. Focus group respondents provided qualitative responses on their experiences returning to class during COVID-19 and adhering to COVID-19-related policies.

### Results

The prevalence of mental health symptoms among survey respondents were 57.6% (n = 593) for depression, 41.5% (n = 427) for anxiety, and 40.8% (n = 420) for stress. Over 90% of respondents reported perceptions of good general health. Female respondents and respondents identified as non-binary gender had an increased risk for mental health symptoms compared to male respondents. Respondents with preexisting medical conditions had an increased risk for worse general health. Themes identified through qualitative analysis

**Funding:** The study was funded by Purdue University's Executive Vice President for Research and Partnerships' Protect Purdue Innovations Faculty Grants (September 2020-January 2021). QD, MDW, and NE received the grant. More information about the grant can be found on <https://www.purdue.edu/research/funding-and-grant-writing/funding/protect.php> The funders and Purdue University had no role in study design, data collection, and analysis, decision to publish, or preparation of the manuscript.

**Competing interests:** The authors have declared that no competing interests exist.

**Abbreviations:** EQ-5D-5L, EuroQol 5-Dimension 5-Level; DASS-21, Depression, Anxiety and Stress Scale 21.

included (1) attending class during COVID-19 is associated with unhealthy behaviors, and poor health, (2) perceived challenges of online learning and increased feelings of isolation, (3) demand for COVID-19 policy reform and greater transparency of COVID-19 statistics; (4) difficulties in adhering to COVID-19 policies; and (5) concerns about acquiring and transmitting COVID-19.

## Conclusions

Our findings indicate that university students attending classes during the pandemic are experiencing negative mental health impacts. Although students were aware of COVID-19-related policies, many found it challenging to comply. Broad acceptance of COVID-19 policies will require greater transparency and information sharing.

## Introduction

The coronavirus disease 2019 (COVID-19) continues to spread globally, with more than 628 million confirmed cases and 6,580,107 deaths in 188 countries as of October 25, 2022 [1]. Before COVID-19 vaccines became widely available, more than 168 million students worldwide were affected due to COVID-19 restrictions [2, 3]. Because of the lack of a standard template for determining whether to educate students remotely, bring them back into the classroom, or create a hybrid model combining both, some universities in the U.S. decided to resume teaching students full-time using a combination of in-person and remote education in the fall/autumn term of 2020 (August-December) [4]. Although a growing body of evidence shows that the COVID-19 pandemic and strict social distancing measures negatively affect young adults' mental and physical health [1, 5], prolonged closures in universities have been associated with worsening mental health and learning outcomes in university students [3, 6]. Prior to COVID-19, the 2019 Annual Report of the Center for Collegiate Mental Health reported over 60% of students seeking counseling had anxiety disorders among 82,685 respondents from 188 universities across the U.S [7]. A recent interview survey conducted among 195 university students in the U.S. showed that nearly 71% of university students reported increased stress and anxiety due to the COVID-19 pandemic, compared to pre-COVID-19 [8]. Additionally, data from the same university found that nearly 50% of university students had a moderate-to-severe level of depression, and 38.5% had a moderate-to-severe level of anxiety [9].

The mental health of university students related to COVID-19 reported by previous studies is a matter of growing concern. Although universities across the globe are re-opening as we enter various recovery phases from COVID-19, few studies have used a qualitative or mixed-methods approach to understand students' perceptions, attitudes, or beliefs concerning the mental and general health effects of attending class during COVID-19, and how university openings under different safety protocols further impact their mental health and general well-being.

The lack of qualitative aspects in understanding the individual effects of returning to class during COVID-19 leaves two important questions unanswered for policymakers and researchers: first, what are university students' on-campus and online learning experiences related to the COVID-19 pandemic? Second, how can learners be supported to optimize coping strategies to mitigate mental health symptoms and facilitate the implementation of preventive

interventions in the future? Although a rise in psychological symptoms of anxiety, depression, and coping response to stress are expected during extraordinary circumstances, heightened levels of psychological distress can negatively impact academic performance for learners such as university students [10]. University safety protocols designed to reduce COVID-19 transmission rates may also inevitably affect students' mental health and general well-being. Despite this, there is little knowledge regarding university students' compliance with safety protocols designed to keep the pandemic controlled while returning to campus during COVID-19.

To understand university students' experiences of attending class in-person or remotely during COVID-19, we designed and conducted a study in a U.S.-based university that remained open, with more than 40,000 students taking courses on campus during the fall/autumn term of 2020. Using social media as a recruitment platform and a sequential mixed-methods approach, we aim to elicit perceptions, attitudes, and experiences from university students regarding the health impacts of attending school during COVID-19. The quantitative analyses investigated the prevalence of symptoms of depression, anxiety, stress, and poor general health, and identified associated risk factors. The qualitative data are drawn from a subsample of university students who had completed the quantitative survey, with a focus on examining how students interpret and give meaning to their class participation experiences, exploring their perceptions and beliefs regarding barriers to compliance with COVID-19 related safety protocols, and ways they can be supported to optimize coping strategies to mitigate mental and general health symptoms and facilitate the implementation of preventive interventions in the future.

## Methods

### Study design

We used a mixed-methods sequential explanatory design consisting of quantitative data and analysis (anonymous online survey) in phase 1, followed by qualitative data collection and analysis (focus group discussions) in phase 2 to enhance understanding of the quantitative results [10].

We also gave slightly greater weight to qualitative data and used the quantitative findings to inform purposeful sampling, refine focus group questions, and analytic paths in the qualitative phase. The quantitative and qualitative phases were connected when selecting respondents for qualitative study and developing interview protocol based on quantitative analysis results. The results of the quantitative and qualitative phases were integrated during the discussion of the findings of the entire study (S1 Fig). We anticipated that the combination of quantitative and qualitative studies would provide a rich and full exploration of factors contributing to worsening mental and general health symptoms among university students attending class during COVID-19 and serve to guide the development of support strategies with consideration of these significant factors.

### Target population

The study's target population was university students attending class partially or completely in-person at a public university in the Midwestern U.S. in the fall/autumn term of 2020. Students who met the survey inclusion criteria ( $N = 6,000$ ) were invited to participate, and their status varied in degree progress, undergraduate/graduate levels, and majors/fields of study pursued. The study sample size was calculated based on one of our primary outcomes, DASS-21 depression scale, as it is known as the most common and significant public health concern with serious clinical impact compared to anxiety [11]. Based on previous research, we expected university students to experience a greater prevalence of depressive symptoms than similarly-

aged adults in the general population [12, 13]. We used G\*Power 3.1.9.6 [14], software for the sample size calculation, specifying a two-tailed test,  $\alpha = 0.05$ ;  $\beta = 0.05$  (95% power); a constant proportion of depressive symptoms in youth in the general population during the COVID-19 pandemic = 0.252 [15], an alternative proportion through Naïve guess according to Cohen (0.5 = medium effect size) [16], and an attrition rate of 20%. The required minimum sample size based on the priori power analysis was estimated at 62 subjects.

## Quantitative phase

**Survey data collection.** We used a cross-sectional web-based survey design in the first phase to collect information from student respondents, including demographics, mental and general health symptoms. At the end of the survey, respondents were given the option to include their email for focus group involvement. The survey was administered via Qualtrics (Provo, UT) during October 2020–December 2020 and was accessed through the URL link. Study recruitment was conducted mainly by convenience sampling. Using Reddit, Facebook, WhatsApp, and Instagram as recruitment platforms, a social media advertising campaign was designed to disseminate the survey link ([S1 Method](#)). The survey link was also distributed through an email campaign that included a random sample of 5,000 students enrolled in the 2020 fall/autumn semester. The survey was designed to take approximately 15 minutes to complete.

**Survey measurements.** The quantitative survey contains three parts. The first part gathered demographic information, including age, gender, race, major/fields of study, education level, type of residence, attend in-person class or not, and pre-existing medical conditions. The second part of the survey consisted of 2 standardized and validated questionnaires, including the Depression, Anxiety, and Stress Scale (DASS) and the EuroQol-5D (EQ-5D) questionnaire [17, 18]. Both EQ-5D and DASS have demonstrated feasibility, reliability, and validity in young adults [19]. Respondents were asked to complete the survey questions based on their experiences attending class in the 2020 fall academic term. The last part of the survey assessed respondents' willingness to participate in the focus group discussions and their preferred way of being contacted if they were selected to participate.

**DASS.** We assessed students' mental health using DASS [17]. DASS is a widely used, validated 21-item self-administered instrument designed to determine the severity of depression, anxiety, and stress symptoms in the past month, with higher scores on each DASS scale indicating more severe levels of depression and anxiety stress [17]. The DASS is not intended to diagnose mental disorders but measures the prevalence of depression, anxiety, and stress symptoms and severity over the prior week [11, 20]. DASS-21 scores were used to evaluate the severity of depression, anxiety, and stress symptoms in this study (mild: 10–13, 8–9, 15–18, respectively; moderate: 14–20, 10–14, 19–25, respectively; and severe to extremely severe:  $\geq 21$ ,  $\geq 15$ ,  $\geq 26$ , respectively).

**EQ-5D.** We assessed students' general health status using the EQ-5D scale, a generic measure of health status. The EQ-5D uses a descriptive system of 5-dimensions (mobility, self-care, usual activities, pain/discomfort, and anxiety/depression) [18, 21]. The EQ-5D has five levels for each dimension (no problems = 1, slight problems = 2, moderate problems = 3, severe problems = 4, extreme problems = 5) [18, 21]. For our analysis, EQ-5D scores in each of the five dimensions were aggregated into three categories (no problem, slight problems, and moderate-to-severe problems). EQ-5D also included a visual analog scale (VAS) with a grade ranging from 0 (worst possible health status) to 100 (best imaginable health state) [22].

## Quantitative data analysis

Descriptive statistics were used to present respondents' demographic characteristics. Prevalence of mental and general health symptoms was calculated using the cutoff scores mentioned above and reported as percentages of cases in each subgroup. Chi-square or Fisher Exact tests were used to compare the prevalence of mild-to-extremely severe symptoms in different subgroups. To determine demographic characteristics associated with moderate-to-extremely severe mental health and general health symptoms, unadjusted and adjusted logistic regression analyses were performed, and odds ratios (ORs) and 95% confidence intervals (CIs) were presented. For overall health (numeric variable), general linear models were used instead. Two-sided Wald tests were conducted to determine where the ORs in regression models were statistically significant. A sensitivity analysis was undertaken, including only respondents who attended in-person classes, to ensure that the findings of the main analysis were robust. For all analyses, the significance level was set to  $P < .05$ . All statistical analyses were performed using SAS (9.4).

## Qualitative phase

**Focus group participants' selection.** We used semi-structured interviews and focus group discussions to collect data in the second (qualitative) phase. Two hundred and seventy eligible respondents who completed the online survey also expressed interest in participating in the focus group discussion. Among the 270 prospective focus group participants, we used purposive sampling to select 1–2 participants that minimally to maximally vary on 4 factors (majors/fields of study, gender, races/ethnicities, had chronic medical conditions or not) [23]. The 4 factors were selected based on literature review and survey findings from the quantitative data. This procedure yielded 36 participants and 27 of them consented to participate.

**Focus group procedures.** Three focus groups (9 participants per group) were held virtually between November 25–December 15, 2020, utilizing videoconferencing software Zoom (San Jose, CA) after the completion of quantitative data collection and analyses. Focus groups were semi-structured, lasting approximately 90 minutes each and facilitated by three psychiatric/mental health nurse practitioners that were not involved in the design or analysis of the study. The semi-structured interview guide was developed based on the quantitative results from the first phase of the study and the aims of gathering participants' views of the university's on-campus COVID-19 safety protocols and their experiences of adherence to these protocols. To gain a deeper understanding of our quantitative findings, we also explored why certain factors (such as presence of medical conditions) contributed to their mental and general health while attending class during COVID-19.

The full semi-structured focus groups guide is included in [S2 Method](#). In brief, each of the three focus groups were divided into three parts, the first part focused on discussing the impact of attending class or events on campus during the pandemic on participants' mental and general well-being. The second part discussed the participants' feelings and experiences in complying with COVID-19-related safety protocols while attending classes on campus. The third part of each focus group explicitly elaborates participants' views regarding the COVID-19-related policies and safety protocols as well as the university's communication around COVID-19-related policies.

**Data analysis.** Each focus group was audiotaped, transcribed, and imported into NVivo Pro (12.3) for analysis. Iterative inductive thematic analysis was used to sift, chart, and sort transcripts in accordance with key issues and themes following five steps: familiarization, identification of a thematic framework, creation of indexing, creation of charting and mapping, and interpretation [24, 25]. Two researchers (QD and EW) analyzed the transcripts

independently at each stage of the process, took notes, and discussed similarities and differences before the next iteration. The development of the thematic map and findings interpretation were discussed and refined during bi-weekly meetings of the research team. Finally, common themes were integrated, and findings were compiled. Saturation was reached after the third focus group, as thematic analysis showed that no new codes, categories, or themes emerged from the qualitative data. Detailed information about the qualitative analysis is described in [S3 Method](#) and [S1 Fig](#).

**Ethical considerations.** To protect our respondents' confidentiality, the survey was anonymous, and respondents in the first phase were assigned a random ID number in the quantitative analyses; the respondents selected for focus groups were given unique passwords to access the virtual focus groups. We also removed names and gender-related pronouns from quotations selected for illustrations. Study recruitment and procedures were approved by the Institutional Review Board of Purdue University. Written informed consent was received online before respondents answered survey questions, and verbal consent was obtained before the focus group discussions.

## Results

### Characteristics of respondents

Of 1047 students that opened the survey link, 1042 student respondents provided consent to participate in the survey ([S2 Fig](#)). Twelve respondents who did not complete the survey or give valid demographic information were excluded from the quantitative analysis. The 1030 respondents (N = 1030) included in the final survey analysis represented undergraduate and graduate students from 195 majors across 11 departments/colleges ([Table 1](#)). The overall response rate was 98.38% (1030 respondents out of 1047), and the sampling fraction was 0.13 (6000 of 45,869 total enrolled students in the fall/autumn 2020 semester). Of the total sample, 603 respondents (58.54%) were women, 15 (1.46%) identified as a gender other than male or female, and 907 respondents (88.06%) were aged 18–24 years. Of the 1030 survey respondents, 714 (69.32%) were non-Hispanic whites, 212 (20.58%) were Asian, and 11 (1.07%) were Black/African American. The survey included data from 865 (83.98%) undergraduate student respondents, 807 (78.35%) of the survey respondents were taking at least one in-person class in the 2020 fall/autumn term, and 474 (46.0%) were living in an on-campus university residence. Our survey also included responses from 202 respondents (19.61%) with pre-existing medical conditions. Demographics information of our focus group participants is listed in [S2 Table](#).

### Prevalence of symptoms of depression, anxiety, and stress

The prevalence of moderate-to-extremely severe DASS-21 symptoms among the student respondents was 57.6% (593/1030) for depression, 41.5% (427/1030) for anxiety, and 40.8% (420/1030) for stress ([Table 2](#)). The prevalence of moderate-to-extremely severe anxiety/depression symptoms on the EQ-5D subscale was 60.1% (619/1030) ([Table 3](#)). The prevalence of moderate-to-severe mental health symptoms was high among females (DASS-D, 62.5%; DASS-A, 47.9%; DASS-S, 46.8%; EQ-5D anxiety/depression, 65.8%), respondents of other genders (DASS-D, 80.0%; DASS-A, 66.6%; DASS-S, 60.0%; EQ-5D anxiety/depression, 73.3%) and those with pre-existing medical conditions (DASS-D, 67.3%; DASS-A, 58.4%; DASS-S, 55.5%; EQ-5D anxiety/depression, 74.8%). The prevalence of anxiety or depression symptoms was also high among non-Hispanic whites (DASS-D, 60.5%; EQ-5D anxiety/depression, 65.5%), respondents from the sciences/health sciences departments (EQ-5D anxiety/

**Table 1. Demographics of overall population in quantitative study.**

| Characteristic                                                                                       |                                        | Total (N = 1030) |
|------------------------------------------------------------------------------------------------------|----------------------------------------|------------------|
| <b>Age range, n (%)</b>                                                                              |                                        |                  |
|                                                                                                      | 15–17                                  | 9 (0.87)         |
|                                                                                                      | 18–24                                  | 907 (88.06)      |
|                                                                                                      | 25–29                                  | 75 (7.28)        |
|                                                                                                      | 30–35                                  | 28 (2.72)        |
|                                                                                                      | >35                                    | 6 (0.58)         |
| <b>Race, n (%) (n (%) may not equal total for separate gender categories due to missing values.)</b> |                                        |                  |
|                                                                                                      | White                                  | 714 (69.32)      |
|                                                                                                      | Asian                                  | 212 (20.58)      |
|                                                                                                      | Black                                  | 11 (1.07)        |
|                                                                                                      | More than one race or other            | 81 (7.86)        |
| <b>Level of education, n (%)</b>                                                                     |                                        |                  |
|                                                                                                      | Undergraduate                          | 865 (83.98)      |
|                                                                                                      | Graduate                               | 165 (16.02)      |
| <b>Has in-person classes for Fall 2020? n (%)</b>                                                    |                                        |                  |
|                                                                                                      | Yes                                    | 807 (78.35)      |
|                                                                                                      | No                                     | 223 (21.65)      |
| <b>Living arrangement, n (%)</b>                                                                     |                                        |                  |
|                                                                                                      | University residences                  | 474 (46.02)      |
|                                                                                                      | Off-campus housing                     | 446 (43.30)      |
|                                                                                                      | Staying at home                        | 59 (5.73)        |
|                                                                                                      | Currently outside of the United States | 51 (4.95)        |
| <b>Has medical conditions? n (%)</b>                                                                 |                                        |                  |
|                                                                                                      | No                                     | 828 (80.39)      |
|                                                                                                      | Yes                                    | 202 (19.61)      |
| <b>Work, n (%)</b>                                                                                   |                                        |                  |
|                                                                                                      | Unemployed                             | 617 (59.90)      |
|                                                                                                      | Part-time                              | 358 (34.76)      |
|                                                                                                      | Full-time                              | 55 (5.34)        |
| <b>How did you hear about our study? n (%)</b>                                                       |                                        |                  |
|                                                                                                      | Electronic mailing list                | 746 (72.43)      |
|                                                                                                      | Social networking platform             | 208 (20.19)      |
|                                                                                                      | Word of mouth (ex.: peers, friends)    | 70 (6.80)        |
|                                                                                                      | Other                                  | 33 (3.20)        |

<https://doi.org/10.1371/journal.pone.0279813.t001>

depression, 65.2%), and those who were working full- or part-time (EQ-5D anxiety/depression, 65.4%). Symptom profiles of focus group respondents are presented in [S3.1 and S3.2. Table](#).

### Prevalence of general health problems

[Table 3](#) shows the prevalence of general health problems (mobility, self-care, usual activities, and pain/discomfort) reported on the EQ-5D profile by respondents' characteristics.

The EQ-5D VAS median score (interquartile range) for respondents was 75 (60–85) ([S4 Table](#)). Most respondents reported perceptions of good general health while attending class during COVID-19. The proportion of respondents who reported moderate-to-severe

Table 2. Prevalence of symptoms of depression, anxiety, and stress (DASS-21) stratified by survey respondent characteristics.

| Characteristic                                                  | Depression                        |                              |                         | P value | Anxiety                           |                              |                         | P value      | Stress                            |                              |                         | P value      |
|-----------------------------------------------------------------|-----------------------------------|------------------------------|-------------------------|---------|-----------------------------------|------------------------------|-------------------------|--------------|-----------------------------------|------------------------------|-------------------------|--------------|
|                                                                 | Respondents with symptom, No. (%) |                              |                         |         | Respondents with symptom, No. (%) |                              |                         |              | Respondents with symptom, No. (%) |                              |                         |              |
|                                                                 | Mild                              | Moderate to Extremely Severe | Total, No. (%) [95% CI] |         | Mild                              | Moderate to Extremely Severe | Total, No. (%) [95% CI] |              | Mild                              | Moderate to extremely severe | Total, No. (%) [95% CI] |              |
| <b>Overall</b>                                                  | 141 (13.7)                        | 593 (57.6)                   | 734 (71.3) [68.5–74.0]  |         | 76 (7.4)                          | 427 (41.5)                   | 503 (48.9) [45.8–51.9]  |              | 109 (10.6)                        | 420 (40.8)                   | 529 (51.4) [48.3–54.4]  |              |
| <b>Gender</b>                                                   |                                   |                              |                         | 0.369   |                                   |                              |                         | 0.058        |                                   |                              |                         | 0.377        |
| Male                                                            | 55 (13.3)                         | 204 (49.6)                   | 259 (62.9) [58.2–67.5]  |         | 32 (7.7)                          | 128 (31.1)                   | 160 (38.8) [34.1–43.5]  |              | 40 (9.7)                          | 129 (31.3)                   | 169 (41.0) [36.3–45.8]  |              |
| Female                                                          | 85 (14.1)                         | 377 (62.5)                   | 462 (76.6) [73.2–80.0]  |         | 44 (7.3)                          | 289 (47.9)                   | 333 (55.2) [51.3–59.2]  |              | 68 (11.3)                         | 282 (46.8)                   | 350 (58.0) [54.1–61.9]  |              |
| Other                                                           | 1 (6.7)                           | 12 (80.0)                    | 13 (86.7) [69.5–100]    |         | 0                                 | 10 (66.7)                    | 10 (66.7) [42.8–90.5]   |              | 1 (6.7)                           | 9 (60.0)                     | 10 (66.7) [42.8–90.5]   |              |
| <b>Race</b>                                                     |                                   |                              |                         | 0.258   |                                   |                              |                         | <b>0.016</b> |                                   |                              |                         | 0.221        |
| White                                                           | 96 (13.4)                         | 432 (60.5)                   | 528 (73.9) [70.7–77.2]  |         | 47 (6.6)                          | 321 (44.9)                   | 368 (51.5) [47.9–55.2]  |              | 76 (10.6)                         | 317 (44.4)                   | 393 (55.0) [51.4–58.7]  |              |
| Non-white                                                       | 45 (14.2)                         | 161 (50.9)                   | 206 (65.2) [60.0–70.4]  |         | 29 (9.2)                          | 106 (33.5)                   | 135 (42.7) [37.3–48.2]  |              | 33 (10.4)                         | 103 (32.6)                   | 136 (43.0) [37.6–48.5]  |              |
| <b>Age range</b>                                                |                                   |                              |                         | 0.527   |                                   |                              |                         | 0.482        |                                   |                              |                         | 0.773        |
| 15–24                                                           | 129 (14.1)                        | 532 (58.1)                   | 661 (72.2) [69.3–75.1]  |         | 70 (7.6)                          | 382 (41.7)                   | 452 (49.3) [46.1–52.6]  |              | 96 (10.5)                         | 374 (40.8)                   | 470 (51.3) [48.1–54.6]  |              |
| ≥ 25                                                            | 12 (10.5)                         | 61 (53.5)                    | 73 (64.0) [55.2–72.8]   |         | 6 (5.3)                           | 45 (39.5)                    | 51 (44.7) [35.6–53.9]   |              | 13 (11.4)                         | 46 (40.4)                    | 59 (51.8) [42.6–60.9]   |              |
| <b>Education</b>                                                |                                   |                              |                         | 0.776   |                                   |                              |                         | 0.446        |                                   |                              |                         | 0.876        |
| Under-graduate                                                  | 118 (13.6)                        | 502 (58.0)                   | 620 (71.7) [68.7–74.7]  |         | 62 (7.2)                          | 363 (41.9)                   | 425 (49.1) [45.8–52.5]  |              | 91 (10.5)                         | 348 (40.2)                   | 439 (50.8) [47.4–54.1]  |              |
| Graduate                                                        | 23 (13.9)                         | 91 (55.2)                    | 114 (69.1) [62.0–76.1]  |         | 14 (8.5)                          | 64 (38.8)                    | 78 (42.3) [39.7–54.9]   |              | 18 (10.9)                         | 72 (43.6)                    | 90 (54.6) [46.9–62.1]   |              |
| <b>Living arrangement</b>                                       |                                   |                              |                         | 0.649   |                                   |                              |                         | 0.429        |                                   |                              |                         | <b>0.021</b> |
| Living in UR (UR: university residences)                        | 66 (13.9)                         | 265 (55.9)                   | 331 (69.8) [65.7–73.9]  |         | 37 (7.8)                          | 187 (39.5)                   | 224 (47.3) [42.8–51.8]  |              | 57 (12.0)                         | 168 (35.4)                   | 225 (47.5) [42.9–51.9]  |              |
| Not living in UR                                                | 75 (13.5)                         | 328 (59.0)                   | 403 (72.5) [68.8–76.2]  |         | 39 (7.0)                          | 240 (43.2)                   | 279 (50.2) [46.0–54.3]  |              | 52 (9.4)                          | 252 (45.3)                   | 304 (54.7) [50.5–58.8]  |              |
| <b>Work status</b>                                              |                                   |                              |                         | 0.322   |                                   |                              |                         | 0.549        |                                   |                              |                         | 0.062        |
| Employed                                                        | 53 (12.8)                         | 250 (60.5)                   | 303 (73.4) [69.1–77.6]  |         | 31 (7.5)                          | 190 (46.0)                   | 221 (53.5) [48.7–58.3]  |              | 39 (9.4)                          | 192 (46.5)                   | 231 (55.9) [51.1–60.7]  |              |
| Unemployed                                                      | 88 (14.3)                         | 343 (55.6)                   | 431 (69.9) [66.2–73.5]  |         | 45 (7.3)                          | 237 (38.4)                   | 282 (45.7) [41.8–49.6]  |              | 70 (11.3)                         | 228 (36.9)                   | 298 (48.3) [44.4–52.2]  |              |
| <b>Has in-person classes for Fall 2020? (Y/N) (Y/N: yes/no)</b> |                                   |                              |                         | 0.748   |                                   |                              |                         | 0.491        |                                   |                              |                         | 0.453        |
| Yes                                                             | 111 (13.8)                        | 474 (58.7)                   | 585 (72.5) [69.4–75.6]  |         | 59 (7.3)                          | 346 (42.9)                   | 405 (50.2) [46.7–53.6]  |              | 87 (10.8)                         | 321 (39.8)                   | 408 (50.6) [47.1–54.0]  |              |
| No                                                              | 30 (13.5)                         | 119 (53.4)                   | 149 (66.8) [60.6–73.0]  |         | 17 (7.6)                          | 81 (36.3)                    | 98 (43.9) [37.4–50.5]   |              | 22 (9.9)                          | 99 (44.4)                    | 121 (54.3) [47.7–60.8]  |              |
| <b>Has medical conditions? (Y/N)</b>                            |                                   |                              |                         | 0.057   |                                   |                              |                         | <b>0.016</b> |                                   |                              |                         | 0.235        |
| Yes                                                             | 22 (10.9)                         | 136 (67.3)                   | 158 (78.2) [72.5–83.9]  |         | 11 (5.4)                          | 118 (58.5)                   | 129 (63.9) [57.2–70.5]  |              | 23 (11.4)                         | 112 (55.4)                   | 135 (66.8) [60.3–73.3]  |              |
| No                                                              | 119 (14.4)                        | 457 (55.2)                   | 576 (69.6) [66.4–72.7]  |         | 65 (7.9)                          | 309 (37.3)                   | 374 (45.2) [41.8–48.6]  |              | 86 (10.4)                         | 308 (37.2)                   | 394 (47.6) [44.2–50.9]  |              |

<https://doi.org/10.1371/journal.pone.0279813.t002>



**Table 3. Severity of mobility, self-care, usual activities, pain/discomfort, and anxiety/depression symptoms (EQ-5D) stratified by survey respondent characteristics.**

| Characteristics                          | Mobility                             |                                   |                        |         | Self-care                            |                                   |                        |         | Usual activities                     |                                       |                        |         |
|------------------------------------------|--------------------------------------|-----------------------------------|------------------------|---------|--------------------------------------|-----------------------------------|------------------------|---------|--------------------------------------|---------------------------------------|------------------------|---------|
|                                          | Respondents with difficulty, No. (%) |                                   |                        |         | Respondents with difficulty, No. (%) |                                   |                        |         | Respondents with difficulty, No. (%) |                                       |                        |         |
|                                          | Slightly difficult                   | Moderately to extremely difficult | Total No. (%) [95% CI] | P value | Slightly difficult                   | Moderately to extremely difficult | Total No. (%) [95% CI] | P value | Slightly difficult                   | Moderately to extremely severe, n (%) | Total No. (%) [95% CI] | P value |
| <b>Overall</b>                           | 59 (5.7)                             | 13 (1.3)                          | 72 (7.0) [5.4–8.6]     |         | 43 (4.2)                             | 22 (2.1)                          | 65 (6.3) [4.8–7.8]     |         | 212 (20.6)                           | 240 (23.3)                            | 452 (43.9) [40.9–46.9] |         |
| <b>Gender</b>                            |                                      |                                   |                        | 0.269   |                                      |                                   |                        | 0.078   |                                      |                                       |                        | 0.761   |
| Male                                     | 21 (5.1)                             | 2 (0.5)                           | 23 (5.6) [3.4–7.8]     |         | 6 (1.5)                              | 4 (1.0)                           | 10 (2.5) [0.9–3.9]     |         | 77 (18.7)                            | 84 (20.4)                             | 162 (39.1) [34.4–43.8] |         |
| Female                                   | 34 (5.6)                             | 11 (1.8)                          | 45 (7.4) [5.4–9.6]     |         | 34 (5.6)                             | 18 (3.0)                          | 52 (8.6) [6.4–10.9]    |         | 131 (21.7)                           | 149 (24.7)                            | 280 (46.4) [42.5–50.4] |         |
| Other                                    | 4 (26.7)                             | 0 (0.0)                           | 4 (26.7) [4.3–49.1]    |         | 3 (20.0)                             | 0 (0.0)                           | 3 (20.0) [0–40.2]      |         | 4 (26.7)                             | 7 (46.6)                              | 11 (73.3) [50.9–95.7]  |         |
| <b>Race</b>                              |                                      |                                   |                        | 0.719   |                                      |                                   |                        | 0.389   |                                      |                                       |                        | 0.148   |
| White                                    | 44 (6.2)                             | 11 (1.5)                          | 55 (7.7) [5.8–9.7]     |         | 31 (4.3)                             | 18 (2.5)                          | 49 (6.8) [5.0–8.7]     |         | 147 (20.6)                           | 181 (25.4)                            | 328 (46.0) [42.3–49.6] |         |
| Non-white                                | 15 (4.8)                             | 2 (0.6)                           | 17 (5.4) [2.9–7.9]     |         | 12 (3.8)                             | 4 (1.3)                           | 16 (5.1) [2.7–7.5]     |         | 65 (20.6)                            | 59 (18.7)                             | 125 (39.3) [33.9–44.6] |         |
| <b>Age range</b>                         |                                      |                                   |                        | 0.349   |                                      |                                   |                        | 0.599   |                                      |                                       |                        | 0.114   |
| 15–24                                    | 53 (5.8)                             | 10 (1.1)                          | 63 (6.9) [5.2–8.5]     |         | 41 (4.5)                             | 20 (2.2)                          | 61 (6.7) [5.0–8.3]     |         | 198 (21.6)                           | 214 (23.4)                            | 412 (45.0) [41.8–48.2] |         |
| ≥ 25                                     | 6 (5.3)                              | 3 (2.6)                           | 9 (7.9) [2.9–12.8]     |         | 2 (1.8)                              | 2 (1.8)                           | 4 (3.6) [0.1–6.9]      |         | 14 (12.3)                            | 26 (22.8)                             | 41 (35.1) [26.3–43.9]  |         |
| <b>Education</b>                         |                                      |                                   |                        | 0.373   |                                      |                                   |                        | 1.000   |                                      |                                       |                        | 0.081   |
| Undergraduate                            | 52 (6.0)                             | 10 (1.2)                          | 62 (7.2) [5.5–8.9]     |         | 38 (4.4)                             | 19 (2.2)                          | 57 (6.6) [4.9–8.2]     |         | 188 (21.7)                           | 199 (23.0)                            | 387 (44.7) [41.4–48.1] |         |
| Graduate                                 | 7 (4.3)                              | 3 (1.8)                           | 10 (6.1) [2.4–9.7]     |         | 5 (3.0)                              | 3 (1.8)                           | 8 (4.8) [1.6–8.1]      |         | 24 (14.6)                            | 41 (24.9)                             | 66 (39.4) [31.9–46.9]  |         |
| <b>Living arrangement</b>                |                                      |                                   |                        | 0.084   |                                      |                                   |                        | 0.663   |                                      |                                       |                        | 0.078   |
| Living in UR (UR: university residences) | 38 (8.0)                             | 5 (1.1)                           | 43 (9.1) [6.5–11.7]    |         | 22 (4.6)                             | 10 (2.2)                          | 32 (6.8) [4.5–9.0]     |         | 105 (22.1)                           | 99 (20.9)                             | 204 (43.0) [38.6–47.5] |         |

(Continued)



Table 3. (Continued)

| Characteristics                                                 | Mobility                             |                                   |                        |           | Self-care                            |                                   |                        |            | Usual activities                     |                                       |                        |              |
|-----------------------------------------------------------------|--------------------------------------|-----------------------------------|------------------------|-----------|--------------------------------------|-----------------------------------|------------------------|------------|--------------------------------------|---------------------------------------|------------------------|--------------|
|                                                                 | Respondents with difficulty, No. (%) |                                   |                        |           | Respondents with difficulty, No. (%) |                                   |                        |            | Respondents with difficulty, No. (%) |                                       |                        |              |
|                                                                 | Slightly difficult                   | Moderately to extremely difficult | Total No. (%) [95% CI] | P value   | Slightly difficult                   | Moderately to extremely difficult | Total No. (%) [95% CI] | P value    | Slightly difficult                   | Moderately to extremely severe, n (%) | Total No. (%) [95% CI] | P value      |
| Female                                                          |                                      |                                   | 157 (26.0)             | 60 (10.0) | 217 (36.0) [32.2–39.8]               |                                   | 144 (23.9)             | 395 (65.5) |                                      | 539 (89.4) [86.9–91.8]                |                        |              |
| Other                                                           |                                      |                                   | 5 (33.3)               | 2 (13.4)  | 7 (46.7) [21.4–71.9]                 |                                   | 3 (20.0)               | 11 (73.3)  |                                      | 14 (93.3) [80.7–100]                  |                        |              |
| <b>Race</b>                                                     |                                      |                                   |                        |           |                                      | 0.963                             |                        |            |                                      |                                       |                        | <b>0.012</b> |
| White                                                           |                                      |                                   | 183 (25.6)             | 66 (9.3)  | 249 (34.9) [31.4–38.4]               |                                   | 176 (24.7)             | 466 (65.3) |                                      | 642 (90.2) [87.7–92.1]                |                        |              |
| Non-white                                                       |                                      |                                   | 73 (23.1)              | 26 (8.2)  | 99 (31.3) [26.2–36.4]                |                                   | 85 (26.9)              | 150 (47.5) |                                      | 235 (74.7) [69.5–79.2]                |                        |              |
| <b>Age range</b>                                                |                                      |                                   |                        |           |                                      | 0.279                             |                        |            |                                      |                                       |                        | 0.517        |
| 15–24                                                           |                                      |                                   | 228 (24.9)             | 78 (8.5)  | 306 (33.4) [30.4–36.5]               |                                   | 230 (25.1)             | 552 (60.3) |                                      | 782 (85.4) [83.1–87.7]                |                        |              |
| ≥ 25                                                            |                                      |                                   | 28 (24.6)              | 14 (12.3) | 42 (36.9) [27.9–45.7]                |                                   | 31 (27.2)              | 64 (56.1)  |                                      | 95 (83.3) [76.5–90.2]                 |                        |              |
| <b>Education level</b>                                          |                                      |                                   |                        |           |                                      | 0.423                             |                        |            |                                      |                                       |                        | 0.342        |
| Undergraduate                                                   |                                      |                                   | 215 (24.9)             | 74 (8.5)  | 289 (33.4) [30.3–36.6]               |                                   | 214 (24.7)             | 521 (60.2) |                                      | 735 (84.9) [82.6–87.4]                |                        |              |
| Graduate                                                        |                                      |                                   | 41 (24.9)              | 18 (10.9) | 59 (35.8) [28.4–43.1]                |                                   | 47 (28.5)              | 95 (57.6)  |                                      | 142 (86.1) [80.8–91.4]                |                        |              |
| <b>Living arrangement</b>                                       |                                      |                                   |                        |           |                                      | 0.656                             |                        |            |                                      |                                       |                        | 0.649        |
| Living in UR (UR: university residences)                        |                                      |                                   | 121 (25.5)             | 41 (8.7)  | 162 (34.2) [29.9–38.5]               |                                   | 123 (25.9)             | 280 (59.1) |                                      | 403 (85.0) [81.8–88.2]                |                        |              |
| Not living in UR                                                |                                      |                                   | 135 (24.3)             | 51 (9.2)  | 186 (33.5) [29.5–37.4]               |                                   | 138 (24.8)             | 336 (60.4) |                                      | 474 (85.2) [82.3–88.2]                |                        |              |
| <b>Work status</b>                                              |                                      |                                   |                        |           |                                      | 0.332                             |                        |            |                                      |                                       |                        | <b>0.039</b> |
| Employed                                                        |                                      |                                   | 102 (24.7)             | 42 (10.2) | 144 (34.9) [30.3–39.5]               |                                   | 94 (22.8)              | 268 (64.9) |                                      | 362 (87.7) [84.5–90.8]                |                        |              |
| Unemployed                                                      |                                      |                                   | 154 (25.0)             | 50 (8.1)  | 204 (33.1) [29.4–36.8]               |                                   | 167 (27.1)             | 348 (56.4) |                                      | 515 (83.5) [80.5–86.4]                |                        |              |
| <b>Has in-person classes for Fall 2020? (Y/N) (Y/N: yes/no)</b> |                                      |                                   |                        |           |                                      | 0.637                             |                        |            |                                      |                                       |                        | 0.451        |

(Continued)

Table 3. (Continued)

| Characteristics                      | Mobility                             |                                   |                        |           | Self-care                            |                                   |                        |            | Usual activities                     |                                       |                        |         |  |
|--------------------------------------|--------------------------------------|-----------------------------------|------------------------|-----------|--------------------------------------|-----------------------------------|------------------------|------------|--------------------------------------|---------------------------------------|------------------------|---------|--|
|                                      | Respondents with difficulty, No. (%) |                                   |                        |           | Respondents with difficulty, No. (%) |                                   |                        |            | Respondents with difficulty, No. (%) |                                       |                        |         |  |
|                                      | Slightly difficult                   | Moderately to extremely difficult | Total No. (%) [95% CI] | P value   | Slightly difficult                   | Moderately to extremely difficult | Total No. (%) [95% CI] | P value    | Slightly difficult                   | Moderately to extremely severe, n (%) | Total No. (%) [95% CI] | P value |  |
| Yes                                  |                                      |                                   | 197 (24.4)             | 73 (9.1)  | 270 (33.5) [30.2–26.7]               |                                   | 203 (25.2)             | 493 (61.1) |                                      | 696 (86.3) [83.9–88.6]                |                        |         |  |
| No                                   |                                      |                                   | 59 (26.5)              | 19 (8.5)  | 78 (35.0) [28.7–41.2]                |                                   | 58 (26.0)              | 123 (55.2) |                                      | 181 (81.2) [76.0–86.3]                |                        |         |  |
| <b>Has medical conditions? (Y/N)</b> |                                      |                                   |                        |           | <b>&lt; .001</b>                     |                                   |                        |            |                                      |                                       | <b>&lt; .001</b>       |         |  |
| Yes                                  |                                      |                                   | 56 (27.7)              | 44 (21.8) | 100 (49.5) [42.6–56.4]               |                                   | 36 (17.8)              | 150 (74.3) |                                      | 186 (92.1) [88.4–95.8]                |                        |         |  |
| No                                   |                                      |                                   | 200 (24.2)             | 48 (5.8)  | 248 (30.0) [26.8–33.1]               |                                   | 225 (27.2)             | 466 (56.3) |                                      | 616 (83.5) [80.9–85.9]                |                        |         |  |

<https://doi.org/10.1371/journal.pone.0279813.t003>

problems with usual activities (e.g., study, housework, leisure activities) was higher in those with medical conditions than those who did not (35.1% vs. 20.4%).

### Demographic characteristics associated with mental and general health symptoms

In the multivariable analysis, respondents who identified as other genders had nearly four times the risk for mental health symptoms compared with male respondents (adjusted ORs: 11.53 [95% CI 1.46–90.96] for DASS-depression, 5.13 [95% CI 1.51–17.38] for DASS-anxiety, and 3.93 [95% CI 1.26–13.62] for DASS stress) (S5 Table). Compared with male respondents, female respondents were also susceptible to symptoms of depression (adjusted ORs: 1.56; 95% CI 1.18–2.05), anxiety (adjusted ORs: 1.82; 95% CI 1.37–2.42), and stress (adjusted ORs: 1.80; 95% CI 1.36–2.38). Respondents who have pre-existing medical conditions (vs. those without) also had an increased risk of mental health symptoms (adjusted ORs: 1.59 [95% CI 1.42–2.26] for DASS-depression, 2.15 [95% CI 1.55–3.01] for DASS-anxiety, and 2.06 [95% CI 1.46–2.91] for DASS stress). Nonetheless, the non-white race was associated with a lower risk of having symptoms of depression (adjusted ORs, 0.74; 95% CI 0.55–0.99), anxiety (adjusted ORs, 0.71; 95% CI 0.52–0.95), and stress (adjusted ORs, 0.58; 95% CI 0.42–0.78). Unadjusted analyses for DASS-21 are shown in S6 Table.

Associations were also identified between respondents having pre-existing medical conditions and three general health symptoms, including difficulty in self-care, problems in usual activities, and pain and discomfort. Detailed results of the unadjusted and adjusted multivariable analyses for EQ-5D and EQ-5D-VAS are shown in S7–S9 Tables.

Sensitivity analyses assessing demographic characteristics associated with mental health (DASS-21) and general health (EQ-5D) restricted to respondents attending in-person classes only showed similar findings (S10.1–S10.3 Table).

### Themes from focus group discussions

We identified five themes related to young adults' views about the health impacts of attending class during the pandemic, their acceptance of COVID-19-related policy measures, and their experiences of adhering to these policies (Fig 1). Key themes and quotations from focus groups were presented in S11 Table. We discuss each of these themes along with related subthemes below.

**Attending class during COVID-19 is associated with unhealthy behaviors and poor health.** Many focus group respondents felt that attending class during COVID-19 significantly impacted their mental and general well-being (Fig 1). Internal and external factors that appeared to influence health negatively included increased sedentary behavior, lack of motivation for class, poor time management, and difficulty balancing class and work duties (e.g., "I definitely feel like I'm exercising a lot less since I'm not going to campus, I'm not walking between buildings. I don't really have a reason to go outside since everything can be done indoors and the gym so far. . . it just makes it really difficult to motivate when you don't have to move.") Not surprisingly, young adults with pre-existing medical conditions expressed more difficulty in maintaining a healthy lifestyle at the time (e.g., "I have joint issues already, which have been increasing lately from being sedentary, and I don't want to.").

**Perceived challenges of online learning and increased feelings of isolation.** Participants expressed how the shift to hybrid or online learning created challenges to learn and

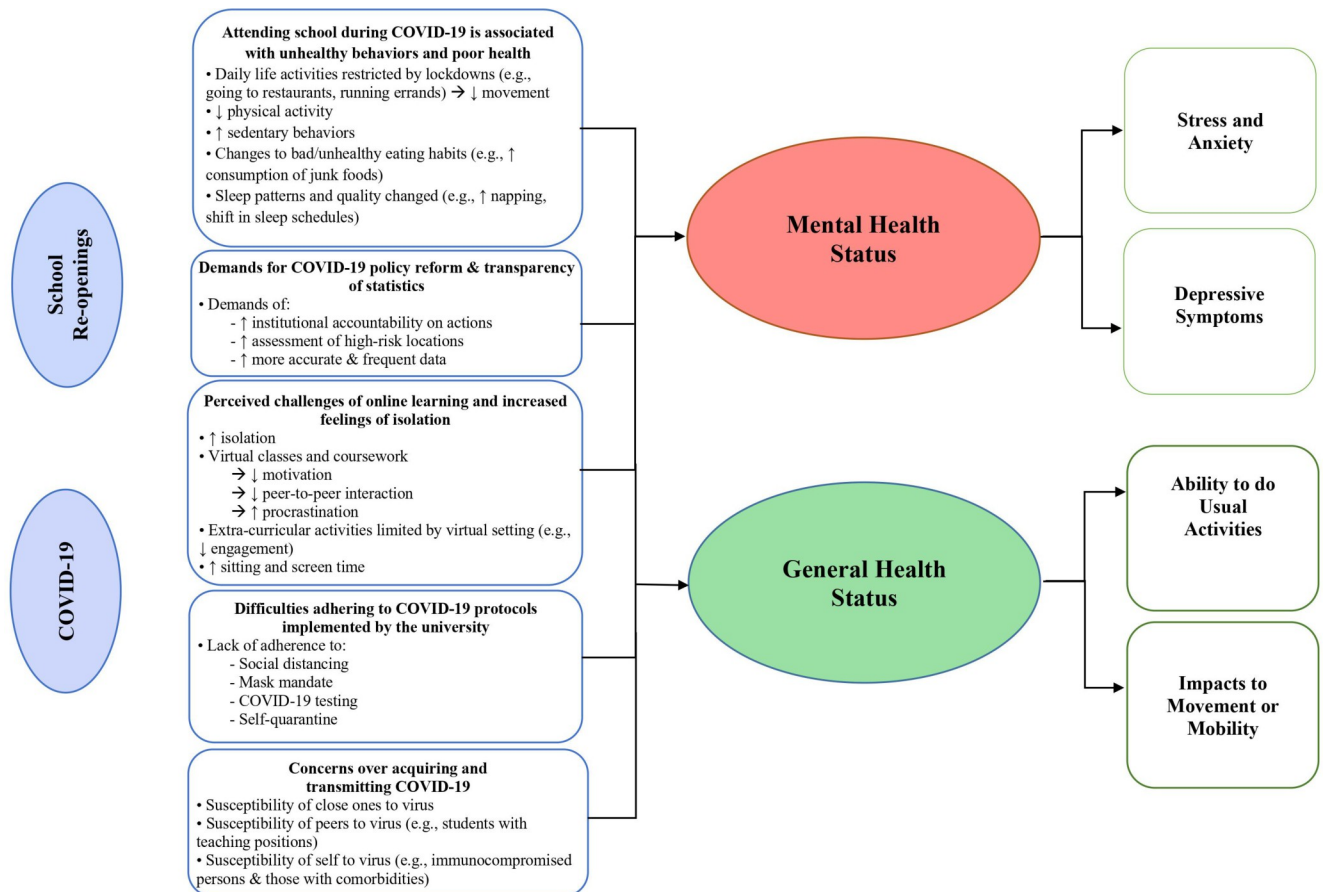

**Fig 1. Themes observed from focus group study.** The impact of attending university during COVID-19 on student respondents' mental and general health status.

<https://doi.org/10.1371/journal.pone.0279813.g001>

communicate with peers and instructors. Decreased peer interaction and motivation and increased procrastination were factors that exacerbated stress and depressive symptoms and impacted participants' ability to perform daily activities (Fig 1). Some perceived that online learning exacerbated problems in academic settings, such as the inability to conduct routine "classroom conversation" with classmates and difficulties reaching out to professors. Many reported increased feelings of isolation from attending class online instead of in-person (e.g., "I've realized all my interactions with my colleagues like in the program where I teach are gone, and um then what that ends up doing psychologically, all the small issues with students or just the difficulties that are kind of endemic to teaching in graduate school, like I don't have that camaraderie and that social support and routine that usually helps me take care of those things really quickly.").

**Demands for COVID-19 policy reform and greater transparency of university COVID-19 statistics.** Many participants felt a need for changes in university COVID-19-related policies and greater transparency of COVID-19 statistics (e.g., "Within classrooms, and within other enclosed spaces. . . they're not doing a really good job of informing people of what risks they might be under, who they might be in contact with, so contact tracing has also been very uninformative and um, not really doing a lot.") Some participants expressed the need for more accountability among institutions rather than individual actions to prevent COVID-19 outbreaks. (e.g., ". . . we all wore our masks and came back to campus. . . but that doesn't take into account different levels of spread or dangers."). Others suggested that the university can do more to enhance protection and prevent COVID-19 transmission, such as identifying and managing high-risk locations and more transparency in campus COVID-19 statistics reporting. A few participants expressed concerns for personal safety and wellbeing due to a lack of COVID-19 risk management in large spaces, such as classes (Fig 1 and S11 Table). In contrast, a few participants spoke highly of the effort and commitment the institution had put forth during the pandemic (e.g., "Our school is doing a really good job compared to other universities and other states, and I think that, no matter where you are there are always going to be those unique instances of people refusing to follow the rules. But overall, we've been here on campus since, you know, the middle of August. And with as many cases as there have been, there have been only 6 hospitalizations and 0 deaths of those tested on campus. . . those are really good statistics compared to the rest of the world. . .").

**Difficulties in adhering to COVID-19-related policies and protocols implemented by the university.** Despite awareness of COVID-19-related policies designed to protect them, some participants reported difficulties in adhering to these policies and protocols implemented by the university. Some also indicated feelings of uneasiness produced by their peers' lack of adherence to COVID-19 policies and testing (e.g., "Someone I was standing with mentioned that their roommate had recently tested positive for COVID. And it's like okay, I think it's fairly reasonable to say if your roommate- who you've been in close contact with for a significant period of time, most likely without a mask on- has tested positive, you probably shouldn't be out in public, even if you are still socially distanced, and what not.") (Fig 1 and S11 Table). Some indicated feeling shame about being tested for COVID. Such a feeling hindered participants and their peers from signing up for testing (e.g., "One time one of my friends thought that they had it and they were like, 'Oh, I don't know if I'm going to tested like that's so embarrassing.")

**Concerns about acquiring COVID-19 and transmitting it to close contacts.** Additionally, some participants expressed concerns about becoming infected or transmitting COVID-19 to others by attending in-person classes during the pandemic (Fig 1). Fears of COVID-19 infection exacerbating pre-existing medical conditions were common among immunocompromised young adults and those with existing comorbidities (e.g., "Being immunocompromised, it's very

important to me that others, you know, adhere to the guidelines when possible because this (COVID-19) is not a disease that I would like to contract or even take home to my parents.”).

## Discussion

The present study investigated university students' views and experiences of returning to class during the COVID-19 pandemic and the perceived impact on their mental and general health. Although most respondents reported good general health, approximately half exhibited depression, anxiety, and stress symptoms. We identified several high-risk populations for mental health symptoms, including young female respondents, respondents who identified as non-binary gender, and those with pre-existing medical conditions. Additionally, findings from our focus groups suggest that sedentary behaviors, challenges of online learning, feelings of isolation, and concerns about acquiring COVID-19 infection contributed to poor mental and general well-being among university student respondents. Broad acceptance of institutional COVID-19-related policies will require clearer interactive communication, greater transparency, and information sharing. In addition to providing a comprehensive profile of mental and general health status among university students returning to class during the pandemic, our study offers concrete suggestions for improving COVID-19-related policy at the institutional level.

The prevalence of mental health symptoms in our study is slightly higher than those reported in previous studies of students' mental health during COVID-19, which ranged from 8.7% to 25.9% for depression, 4.2% to 25% for anxiety, and 10.5% to 25% for stress. [26–29]. Differences in study design, geographical locations, and survey questionnaires may explain some differences. However, our findings may also be due to a higher percentage of respondents who were older than 18 years (98.6%), female (58.5%), and respondents with pre-existing medical conditions (19.6%) in our cohort, since the prevalence of mental health problems increase by age and are more common among females and young adults with chronic disease [30–32]. Compared with prior academic terms, increased depression and anxiety were observed among university students during the fall/autumn 2020 term, according to a U.S. longitudinal study [33]. In a Spanish study using DASS-21, researchers reported rates of moderate-to-severe symptoms of depression, anxiety, and stress among university students during the academic year 2018–2019 were approximately 11%, 16%, and 23%, respectively [34]. This prevalence was lower than what was observed in studies during the pandemic. Collectively, these findings reveal the psychological impacts of the pandemic on university students and call for timely prevention and management to reduce adverse academic and psychosocial outcomes, including psychiatric illness among students.

The present study identified subgroups of students who were likely to develop mental and physical health symptoms. Compared to male respondents, female respondents and respondents who identified as non-binary gender were significantly more likely to report mental health symptoms. The association between female gender and poor mental health was less surprising as this is consistent with earlier studies among students [27, 28, 35, 36]. Although the number of non-binary gender respondents included in the study was too small to draw definitive conclusions, we found a trend towards a much higher prevalence of depression, anxiety, and stress symptoms among this subgroup. The higher risk of mental health symptoms among these university respondents who returned to class during the pandemic may be attributable to changes in their socio-economic circumstances, difficulties in accessing gender affirmation services, and returning home to unsafe environments during COVID-19 [37, 38]. Moreover, we found that respondents with pre-existing medical conditions were susceptible to poorer mental health and had more difficulties with daily living activities during the pandemic. This

is worth the attention as the proportion of students with chronic conditions in our study was comparable to those reported in the general university student population in the U.S. [39, 40], and chronic diseases significantly impact young adults' well-being regardless of the presence of the pandemic [41, 42]. Yet, the research literature has left largely unexplored the combined effects of chronic conditions and returning to class during COVID-19 on mental and general health among university students. Therefore, the present study fills the gap by revealing specific mental and general health problems perceived by these understudied populations during the COVID-19 pandemic.

Another prominent finding from our focus group discussions was the substantial impact of COVID-19 policy on respondents' lifestyles and mental health, which is consistent with prior studies [43]. Social distancing, isolation, and sedentary lifestyle associated with COVID-19 policies can contribute to poor mental health in young adults [3, 43, 44]. College students in places with closed campuses and all courses switched to online reported higher levels of unhappiness and worry than those in areas with open campuses in session [43]. Students may experience stress about canceling exams and anticipated events, anxiety about the job market or an academic/financial burden, and fear of infection [3]. Loss of in-person social interaction and absence of pre-COVID-19 university routine can result in boredom and lack of innovative ideas for engaging in academic and extracurricular activities [3, 45]. In the present study, nearly 80% of respondents returned to in-person classes during Fall of 2020. Our results imply that providing in-person learning experiences at an accelerating pace without addressing underlying causes of mental health problems may not necessarily have a positive influence on students' mental well-being.

Our study also highlights challenges in implementing specific institutional-level COVID-19 policies. Perceived higher normative pressure from family and friends was associated with increased odds of intentional non-adherence to social distancing rules during the COVID-19 pandemic [46]. Research conducted in the general population has also shown that willingness to comply with governmental COVID-19 policy was markedly lower among those with low trust in the system and are concerned about infection [47]. Further, concern about transparency in information sharing, communication of evidence, and insights into decision-making processes can affect individuals' perceptions of an institution's pandemic response [48]. Although the circumstances and culture of each institution are unique and academic institutions' responses to re-opening during the pandemic may differ to accommodate particular circumstances, evidence from this study shows that clear communication about COVID-19 policy, transparency, and rapid data sharing will help enhance compliance with procedures.

### Study limitations

The following study limitations need to be acknowledged. First, we surveyed students only once, preventing us from determining causative factors for increased mental or general health symptoms. Second, most respondents were recruited from social media platforms due to high concentrations of student involvement in social groups where the advertisement was posted. This limits part of the study's subject selection to students who were active on social media during the recruitment period. Third, although respondents were from 195 majors, four different races, and five age ranges, the study was conducted in a U.S. public university with primarily white students; thus, the sample's representativeness might be limited. Future research may be needed to recruit a more socioeconomically and ethnically diverse sample to understand better how university students think about the impact on their health of returning to class during COVID-19. Lastly, the study quantitative phase employed a cross-sectional study design,



and our findings may only reflect respondents' health status during the pre-vaccination era of the COVID-19 pandemic. COVID-19 restriction guidance has been eased, and many students may have received the COVID-19 vaccine; thus, follow-up studies are needed to determine mental and general health changes among students throughout the pandemic.

## Conclusions

Our findings demonstrate that university students were experiencing high levels of depression, anxiety, and stress while returning to class during the COVID-19 pandemic, especially female students, gender non-binary students, and those with pre-existing medical conditions. Institutional COVID-19-related policies, including social distancing, isolation, and the switch to online learning, were closely associated with students' mental and physical health. Broad acceptance of these policies will require clear communication with students, developing students' trust, and acknowledging students' experiences. As universities worldwide resume in-person learning, early intervention is necessary to address students' mental and physical health needs. The information gained from this study will help inform student-oriented wellness programs and mental health services to mitigate potential long-term negative impacts on student education and well-being.

## Supporting information

**S1 Fig. Mixed methods sequential explanatory design procedures.**  
(DOCX)

**S2 Fig. Flow diagram of survey and focus group study recruitment.**  
(DOCX)

**S1 Method. Overview of the social media recruitment process.**  
(DOCX)

**S2 Method. Focus group discussion guide.**  
(DOCX)

**S3 Method. NVivo qualitative analysis procedure.**  
(DOCX)

**S1 Table. Example of interpretive description coding and analysis.**  
(DOCX)

**S2 Table. Demographics of focus group population by gender.**  
(DOCX)

**S3 Table. Prevalence of symptoms of DASS-21 and EQ-5D scales stratified by focus group respondents' characteristics.**  
(DOCX)

**S4 Table. Median and interquartile ranges of EQ-5D VAS scores by survey respondents' characteristics.**  
(DOCX)

**S5 Table. Adjusted multivariable regression analysis of DASS-21 associated with characteristics of survey respondents.**  
(DOCX)

**S6 Table. Unadjusted analysis of DASS-21 associated with characteristics of survey respondents.**

(DOCX)

**S7 Table. Unadjusted analysis of EQ-5D scales associated with characteristics of survey respondents.**

(DOCX)

**S8 Table. Adjusted multivariable regression analysis of EQ-5D scales associated with characteristics of survey respondents.**

(DOCX)

**S9 Table. Multiple linear regression analysis of factors associated with overall health score (EQ-5D-VAS) in survey respondents.**

(DOCX)

**S10 Table. Sensitivity analysis of factors associated with mental health and overall health score, restricted to survey respondents attending in-person class only.**

(DOCX)

**S11 Table. Key themes in respondents' feedback from focus group discussion.**

(DOCX)

**S12 Table. Checklist for Reporting Results of Internet E-Surveys (CHERRIES).**

(PDF)

## Acknowledgments

The authors are grateful to the students who participated in the survey and focus group discussions. All authors also gratefully acknowledge the contributions of Rasesh Ramadesikan, Meenakshi Ramakrishnan, Olivia Tan, Shreyas Chickerur, Ankush Maheshwari, Aniket Gupta, Griffin Hentzen, Lekha Durai, and Dian Ye with quantitative survey development, data management, and social media campaigns. Additionally, they would like to acknowledge psychiatric mental health nurse practitioners Les Keith and Carol Lancaster for facilitating the focus group discussions and Purdue's Data Mine Learning Community for coordination.

## Author Contributions

**Conceptualization:** Qinglan Ding.

**Data curation:** Qinglan Ding, Mark Daniel Ward, Emily Anna Wu.

**Formal analysis:** Qinglan Ding.

**Funding acquisition:** Qinglan Ding, Mark Daniel Ward, Nancy Edwards.

**Investigation:** Qinglan Ding.

**Methodology:** Qinglan Ding, Susan Kersey.

**Project administration:** Qinglan Ding.

**Resources:** Qinglan Ding, Susan Kersey.

**Software:** Qinglan Ding, Emily Anna Wu.

**Supervision:** Qinglan Ding, Susan Kersey.

**Validation:** Qinglan Ding.

**Visualization:** Qinglan Ding, Emily Anna Wu.

**Writing – original draft:** Qinglan Ding.

**Writing – review & editing:** Qinglan Ding, Mark Daniel Ward, Nancy Edwards, Emily Anna Wu, Susan Kersey, Marjorie Funk.

## References

1. Dong E, Du H, Gardner L. An interactive web-based dashboard to track COVID-19 in real time. *Lancet Infect Dis.* 2020; 20(5):533–4. [https://doi.org/10.1016/S1473-3099\(20\)30120-1](https://doi.org/10.1016/S1473-3099(20)30120-1) PMID: 32087114
2. A S., Thompson G. COVID-19: Schools for more than 168 million children globally have been completely closed for almost a full year, says UNICEF. UNICEF 2021. p. <https://www.unicef.org/press-releases/schools-more-168-million-children-globally-have-been-completely-closed>.
3. Lee J. Mental health effects of school closures during COVID-19. *Lancet Child Adolesc Health.* 2020; 4(6):421. [https://doi.org/10.1016/S2352-4642\(20\)30109-7](https://doi.org/10.1016/S2352-4642(20)30109-7) PMID: 32302537
4. Meckler L, Strauss V, Anderson N. Chaos coast to coast as a school year like no other launches. *Washington Post* 2020. p. [https://www.washingtonpost.com/education/schools-colleges-covid-reopen/2020/08/09/44a78044-d826-11ea-930e-d88518c57dcc\\_story.html](https://www.washingtonpost.com/education/schools-colleges-covid-reopen/2020/08/09/44a78044-d826-11ea-930e-d88518c57dcc_story.html).
5. Grubic N, Badovinac S, Johri AM. Student mental health in the midst of the COVID-19 pandemic: A call for further research and immediate solutions. *Int J Soc Psychiatry.* 2020; 66(5):517–8. <https://doi.org/10.1177/0020764020925108> PMID: 32364039
6. Cummings M. COVID school closures most harm students from poorest neighborhoods. *Yale News* 2021 p. <https://news.yale.edu/2021/01/05/covid-school-closures-most-harm-students-poorest-neighborhoods>.
7. Health. CfCM. Center for Collegiate Mental Health 2019 Annual Report. Pennsylvania State University, Center for Collegiate Mental Health; 2020. Contract No.: STA 20–244.
8. Son C, Hegde S, Smith A, Wang X, Sasangohar F. Effects of COVID-19 on College Students' Mental Health in the United States: Interview Survey Study. *J Med Internet Res.* 2020; 22(9):e21279. <https://doi.org/10.2196/21279> PMID: 32805704
9. Wang X, Hegde S, Son C, Keller B, Smith A, Sasangohar F. Investigating Mental Health of US College Students During the COVID-19 Pandemic: Cross-Sectional Survey Study. *J Med Internet Res.* 2020; 22(9):e22817. <https://doi.org/10.2196/22817> PMID: 32897868
10. National College health assessment II: Reference group executive summary spring 2019. In: Association. ACH, editor.: American College Health Association 2019.
11. Imam S. Depression Anxiety Stress Scales (DASS): Revisited. *The Journal of Behavioral Science.* 2008;3.
12. Silva HA, Passos MH, Oliveira VM, Palmeira AC, Pitangui AC, Araújo RC. Short version of the Depression Anxiety Stress Scale-21: is it valid for Brazilian adolescents? *Einstein (Sao Paulo).* 2016; 14(4):486–93. <https://doi.org/10.1590/S1679-45082016AO3732> PMID: 28076595
13. Chin EG. 12-Item depression, anxiety, and stress scales (Dass-12): associations with self-report measures, A semi-structured interview, and behavioral tasks. *Electronic Theses and Dissertations: University of Mississippi* 2015.
14. Faul F, Erdfelder E, Buchner A, Lang AG. Statistical power analyses using G\*Power 3.1: tests for correlation and regression analyses. *Behav Res Methods.* 2009; 41(4):1149–60. <https://doi.org/10.3758/BRM.41.4.1149> PMID: 19897823
15. Racine N, McArthur BA, Cooke JE, Eirich R, Zhu J, Madigan S. Global Prevalence of Depressive and Anxiety Symptoms in Children and Adolescents During COVID-19: A Meta-analysis. *JAMA Pediatr.* 2021; 175(11):1142–50. <https://doi.org/10.1001/jamapediatrics.2021.2482> PMID: 34369987
16. Sullivan GM, Feinn R. Using Effect Size-or Why the P Value Is Not Enough. *J Grad Med Educ.* 2012; 4(3):279–82. <https://doi.org/10.4300/JGME-D-12-00156.1> PMID: 23997866
17. Lovibond SH, Lovibond PF, Psychology Foundation of A. Manual for the depression anxiety stress scales. Sydney, N.S.W.: Psychology Foundation of Australia; 1995.
18. Rabin R, de Charro F. EQ-5D: a measure of health status from the EuroQol Group. *Ann Med.* 2001; 33(5):337–43. <https://doi.org/10.3109/07853890109002087> PMID: 11491192

19. Ravens-Sieberer U, Wille N, Badia X, Bonsel G, Burström K, Cavrini G, et al. Feasibility, reliability, and validity of the EQ-5D-Y: results from a multinational study. *Qual Life Res.* 2010; 19(6):887–97. <https://doi.org/10.1007/s11136-010-9649-x> PMID: 20401552
20. Osman A, Wong JL, Bagge CL, Freedenthal S, Gutierrez PM, Lozano G. The Depression Anxiety Stress Scales—21 (DASS-21): Further Examination of Dimensions, Scale Reliability, and Correlates. *Journal of Clinical Psychology.* 2012; 68(12):1322–38. <https://doi.org/10.1002/jclp.21908> PMID: 22930477
21. Brooks RG, Rabin R, De Charro F. The measurement and valuation of health status using EQ-5D: a European perspective: evidence from the EuroQol BIOMED Research Programme. Dordrecht; Boston: Kluwer Academic Pub.; 2003.
22. Herdman M, Gudex C, Lloyd A, Janssen M, Kind P, Parkin D, et al. Development and preliminary testing of the new five-level version of EQ-5D (EQ-5D-5L). *Qual Life Res.* 2011; 20(10):1727–36. <https://doi.org/10.1007/s11136-011-9903-x> PMID: 21479777
23. Creswell JW, Poht CN. *Qualitative Inquiry and research design choosing among five approaches.* Edition t, editor. Thousand Oaks: SAGE Publications, Inc.; 2018 2018.
24. Morgan DL, Nica A. Iterative thematic inquiry: A new method for analyzing qualitative data. *International Journal of Qualitative Methods.* 2020; 19:1609406920955118.
25. Ritchie J, Spencer L. Qualitative data analysis for applied policy research. In: Bryman A, Burgess R, Eds., editors. *Anal Qual Data.* Routledge, London 1994. p. 173–94.
26. Cao W, Fang Z, Hou G, Han M, Xu X, Dong J, et al. The psychological impact of the COVID-19 epidemic on college students in China. *Psychiatry Res.* 2020; 287:112934. <https://doi.org/10.1016/j.psychres.2020.112934> PMID: 32229390
27. Wu X, Tao S, Zhang Y, Li S, Ma L, Yu Y, et al. Geographic Distribution of Mental Health Problems Among Chinese College Students During the COVID-19 Pandemic: Nationwide, Web-Based Survey Study. *J Med Internet Res.* 2021; 23(1):e23126. <https://doi.org/10.2196/23126> PMID: 33439853
28. Schwartz KD, Exner-Cortens D, McMorris CA, Makarenko E, Arnold P, Van Bavel M, et al. COVID-19 and Student Well-Being: Stress and Mental Health during Return-to-School. *Can J Sch Psychol.* 2021; 36(2):166–85. <https://doi.org/10.1177/08295735211001653> PMID: 34040284
29. Wang D, Chen H, Zhai S, Zhu Z, Huang S, Zhou X, et al. Is returning to school during the COVID-19 pandemic stressful? A study on immediate mental health status of Chinese college students. *J Affect Disord.* 2021; 287:261–7. <https://doi.org/10.1016/j.jad.2021.03.035> PMID: 33799046
30. Ghandour RM, Sherman LJ, Vladutiu CJ, Ali MM, Lynch SE, Bitsko RH, et al. Prevalence and Treatment of Depression, Anxiety, and Conduct Problems in US Children. *J Pediatr.* 2019; 206:256–67.e3. <https://doi.org/10.1016/j.jpeds.2018.09.021> PMID: 30322701
31. Van Droogenbroeck F, Spruyt B, Keppens G. Gender differences in mental health problems among adolescents and the role of social support: results from the Belgian health interview surveys 2008 and 2013. *BMC Psychiatry.* 2018; 18(1):6. <https://doi.org/10.1186/s12888-018-1591-4> PMID: 29320999
32. Brady AM, Deighton J, Stansfeld S. Chronic illness in childhood and early adolescence: A longitudinal exploration of co-occurring mental illness. *Dev Psychopathol.* 2020:1–14.
33. Huckins JF, daSilva AW, Wang W, Hedlund E, Rogers C, Nepal SK, et al. Mental Health and Behavior of College Students During the Early Phases of the COVID-19 Pandemic: Longitudinal Smartphone and Ecological Momentary Assessment Study. *J Med Internet Res.* 2020; 22(6):e20185. <https://doi.org/10.2196/20185> PMID: 32519963
34. Ramón-Arbués E, Gea-Caballero V, Granada-López JM, Juárez-Vela R, Pellicer-García B, Antón-Solanas I. The Prevalence of Depression, Anxiety and Stress and Their Associated Factors in College Students. *Int J Environ Res Public Health.* 2020;17(19).
35. Chen F, Zheng D, Liu J, Gong Y, Guan Z, Lou D. Depression and anxiety among adolescents during COVID-19: A cross-sectional study. *Brain Behav Immun.* 2020; 88:36–8. <https://doi.org/10.1016/j.bbi.2020.05.061> PMID: 32464156
36. Prowse R, Sherratt F, Abizaid A, Gabrys RL, Hellemans KGC, Patterson ZR, et al. Coping With the COVID-19 Pandemic: Examining Gender Differences in Stress and Mental Health Among University Students. *Front Psychiatry.* 2021; 12:650759. <https://doi.org/10.3389/fpsy.2021.650759> PMID: 33897499
37. Restar AJ, Jin H, Jarrett B, Adamson T, Baral SD, Howell S, et al. Characterising the impact of COVID-19 environment on mental health, gender affirming services and socioeconomic loss in a global sample of transgender and non-binary people: a structural equation modelling. *BMJ Glob Health.* 2021; 6(3).
38. Gonzales G, Loret de Mola E, Gavulic KA, McKay T, Purcell C. Mental Health Needs Among Lesbian, Gay, Bisexual, and Transgender College Students During the COVID-19 Pandemic. *J Adolesc Health.* 2020; 67(5):645–8. <https://doi.org/10.1016/j.jadohealth.2020.08.006> PMID: 32933837

39. Statista. Percentage of college students in the U.S. who had ever been diagnosed with select conditions, as of fall 2021: Statista 2022 [Available from: <https://www.statista.com/statistics/1126483/us-college-student-conditions/>].
40. Lemly DC, Lawlor K, Scherer EA, Kelemen S, Weitzman ER. College health service capacity to support youth with chronic medical conditions. *Pediatrics*. 2014; 134(5):885–91. <https://doi.org/10.1542/peds.2014-1304> PMID: 25349315
41. Lee SL, Cheung YF, Wong HS, Leung TH, Lam TH, Lau YL. Chronic health problems and health-related quality of life in Chinese children and adolescents: a population-based study in Hong Kong. *BMJ Open*. 2013; 3(1). <https://doi.org/10.1136/bmjopen-2012-001183> PMID: 23293240
42. Bai G, Herten MH, Landgraf JM, Korfage IJ, Raat H. Childhood chronic conditions and health-related quality of life: Findings from a large population-based study. *PLoS One*. 2017; 12(6):e0178539. <https://doi.org/10.1371/journal.pone.0178539> PMID: 28575026
43. Chen WL, Song SY, Yap KH. The Unintended Consequences of the Pandemic: The New Normal for College Students in South Korea and Taiwan. *Front Public Health*. 2021; 9:598302. <https://doi.org/10.3389/fpubh.2021.598302> PMID: 34046381
44. Williams SN, Armitage CJ, Tampe T, Dienes K. Public perceptions and experiences of social distancing and social isolation during the COVID-19 pandemic: a UK-based focus group study. *BMJ Open*. 2020; 10(7):e039334. <https://doi.org/10.1136/bmjopen-2020-039334> PMID: 32690752
45. Singh S, Roy D, Sinha K, Parveen S, Sharma G, Joshi G. Impact of COVID-19 and lockdown on mental health of children and adolescents: A narrative review with recommendations. *Psychiatry research*. 2020; 293:113429. <https://doi.org/10.1016/j.psychres.2020.113429> PMID: 32882598
46. Hills S, Eraso Y. Factors associated with non-adherence to social distancing rules during the COVID-19 pandemic: a logistic regression analysis. *BMC Public Health*. 2021; 21(1):352. <https://doi.org/10.1186/s12889-021-10379-7> PMID: 33581734
47. Lalot F, Heering MS, Rullo M, Travaglino GA, Abrams D. The dangers of distrustful complacency: Low concern and low political trust combine to undermine compliance with governmental restrictions in the emerging Covid-19 pandemic. *Group Processes & Intergroup Relations*. 0(0):1368430220967986.
48. Enria L, Waterlow N, Rogers NT, Brindle H, Lal S, Eggo RM, et al. Trust and transparency in times of crisis: Results from an online survey during the first wave (April 2020) of the COVID-19 epidemic in the UK. *PLoS One*. 2021; 16(2):e0239247. <https://doi.org/10.1371/journal.pone.0239247> PMID: 33591985
